# Supplementary material
Source: PubMed Central journal article supplement (PMC9069488)
Supplement: NIHMS1784890-supplement-6.pdf [file NIHMS1784890-supplement-6.pdf]

**A**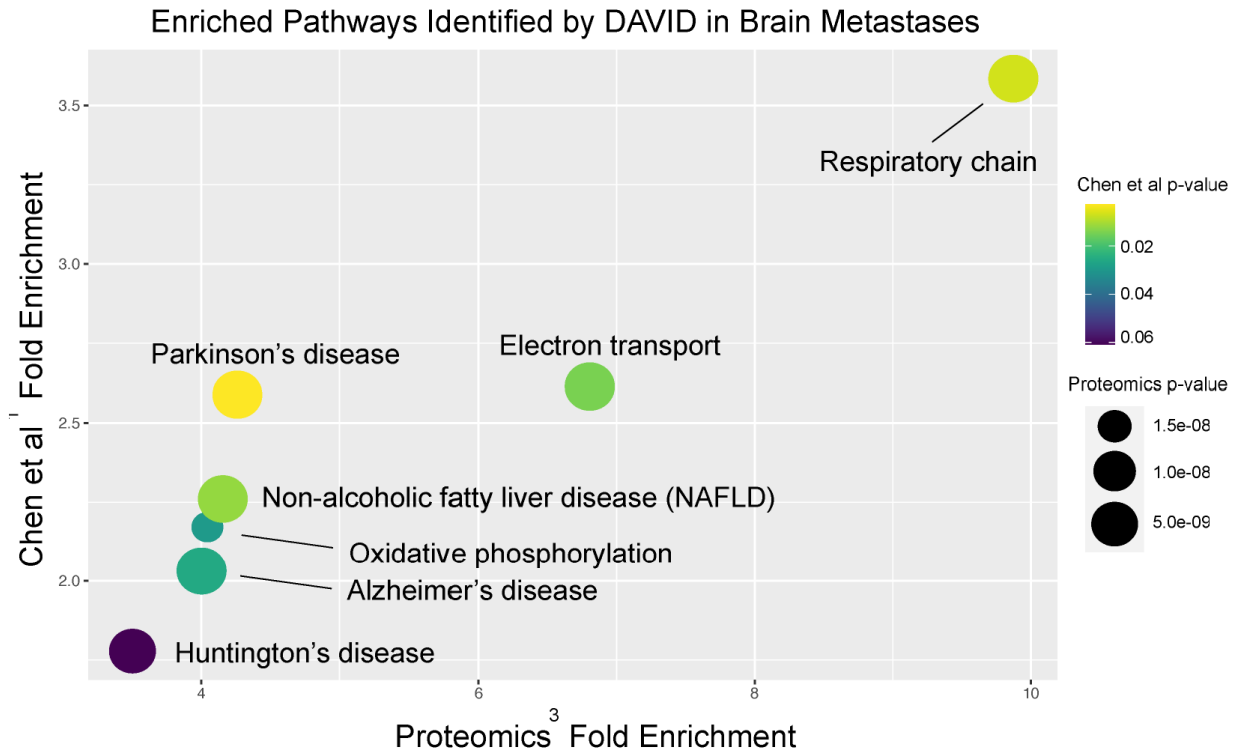**B**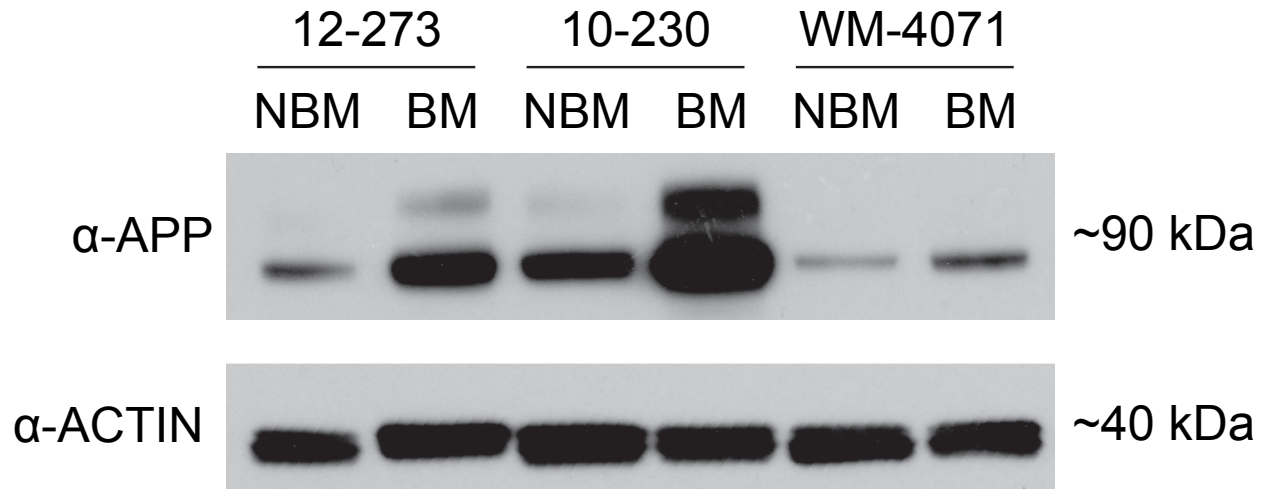

**Supplementary Figure S2.** Production of A $\beta$  by Melanoma Cells is Associated with Brain Metastasis. **A**, Bubble plot comparing pathway enrichment in full cohort BM/NBM proteomics dataset vs. BM/NBM gene expression from previously published Chen et al dataset (GEO Accession # GSE50496). **B**, Western blot analysis of APP in paired STCs.
