# Supplementary material
Source: PubMed Central journal article supplement (PMC9069488)
Supplement: NIHMS1784890-supplement-8.pdf [file NIHMS1784890-supplement-8.pdf]

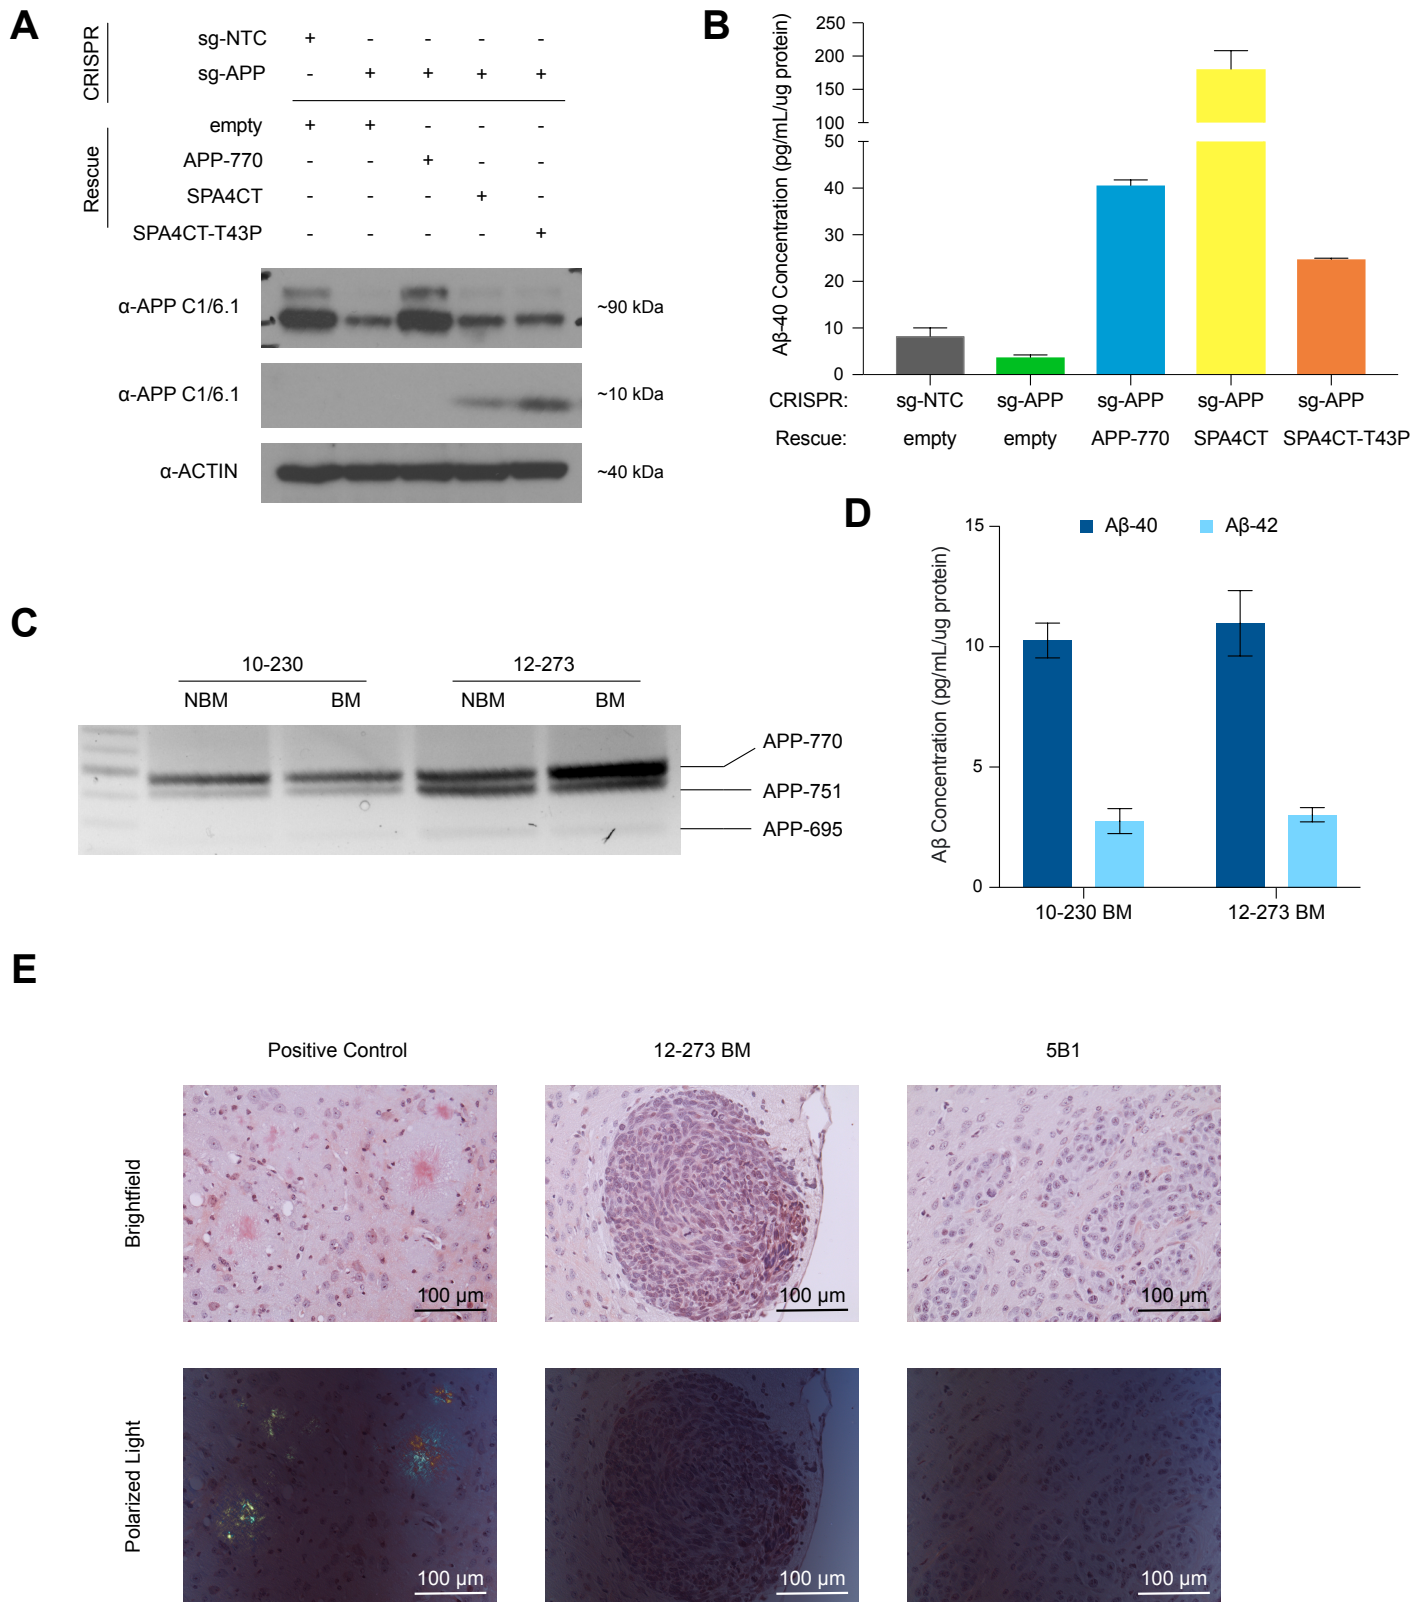

**Supplementary Figure S4.** Aβ is the form of APP required for Melanoma Brain Metastasis. **A**, Western blot analysis of APP and SPA4CT in 12-273 BM transduced with the indicated constructs. **B**, Quantification of Aβ-40 secretion by ELISA in 12-273 BM transduced cells. **C**, Semi-quantitative RT-PCR of APP isoforms in 10-230 and 12-273 STC pairs. **D**, Quantification of Aβ-40 and Aβ-42 secretion by ELISA in 10-230 BM and 12-273 BM. **E**, Representative images of Congo Red stained FFPE sections from mouse brains with metastasis after intracardiac injection with 12-273BM or 5B1. Positive control mouse brain FFPE section is from a mouse model of Alzheimer's disease with Aβ plaques and without brain metastasis.
